# Supplementary material for: Magmas Inhibition in Prostate Cancer: A Novel Target for Treatment-Resistant Disease
Source: MDPI journal article supplement (doi:10.3390/cancers14112732), 2022-05-31
Supplement: s1 [file cancers-1690907-supplementary.pdf › cancers-1690907-supplementary.pdf]

## Supplementary Table S1: Description of datasets used from Oncomine/cBioPortal databases.

| Database   | Name of dataset                                                | Description of samples                                                                                                    | Accession Number | Reference Number |
|------------|----------------------------------------------------------------|---------------------------------------------------------------------------------------------------------------------------|------------------|------------------|
| Oncomine   | Arredouani Prostate                                            | 13 prostate cancer and 8 normal prostate samples                                                                          | GSE55945         | 15               |
| Oncomine   | Grasso Prostate                                                | 59 localized prostate cancer and 35 metastatic castrate resistant prostate cancer with 28 matched benign prostate samples | GSE35988         | 16               |
| Oncomine   | Lapointe Prostate                                              | 62 prostate cancer and 41 normal prostate samples                                                                         |                  | 17               |
| Oncomine   | Liu Prostate                                                   | 44 prostate cancer and 13 normal prostate samples                                                                         |                  | 18               |
| Oncomine   | Tamura Prostate                                                | 25 hormone-resistant prostate cancer and 10 hormone-sensitive prostate cancer with 5 normal prostate samples              | GSE6811          | 19               |
| Oncomine   | Taylor Prostate                                                | 150 prostate cancer and 29 normal prostate samples                                                                        | GSE21032         | 20               |
| Oncomine   | Vanaja Prostate                                                | 32 prostate cancer and 8 normal prostate samples                                                                          |                  | 21               |
| Oncomine   | Varambally Prostate                                            | 5 localized prostate cancer and 4 metastatic prostate cancer with 4 benign prostate samples                               | GSE3325          | 22               |
| cBioPortal | Neuroendocrine Prostate Cancer (Multi-Institute, Nat Med 2016) | 114 metastatic prostate cancer tumor/normal pairs                                                                         |                  | 24               |
| cBioPortal | Prostate Adenocarcinoma                                        | 176 tumors from 63 patients with                                                                                          |                  | 25               |

|            |                                              |                                                    |    |
|------------|----------------------------------------------|----------------------------------------------------|----|
|            | (Fred Hutchinson CRC, Nat Med 2016)          | disseminated prostate cancer with matched normals. |    |
| cBioPortal | Prostate Adenocarcinoma (MSK, Eur Urol 2020) | 1465 prostate adenocarcinoma tumor/normal pairs    | 26 |

---

**Contd.**

---

| Database   | Name of dataset                                             | Description of samples                                 | Accession Number | Reference Number |
|------------|-------------------------------------------------------------|--------------------------------------------------------|------------------|------------------|
| cBioPortal | Metastatic Prostate Cancer (SU2C/PCF Dream Team, Cell 2015) | 150 metastatic prostate cancer tumor/normal pairs      |                  | 27               |
| cBioPortal | Prostate Adenocarcinoma (TCGA, Cell 2015)                   | 333 primary prostate adenocarcinoma tumor/normal pairs |                  | 23               |
| cBioPortal | Prostate Adenocarcinoma (TCGA, PanCancer Atlas)             | 494 primary prostate adenocarcinoma tumor/normal pairs |                  |                  |
| cBioPortal | Prostate Adenocarcinoma (TCGA, Firehose Legacy)             | 501 primary prostate adenocarcinoma tumor/normal pairs |                  |                  |

---

## Supplementary Table S2: statistical analyses with P-values

**Table S2-1. Data and *P* Value for Figure 4A**

|             | Without Z-VAD | With Z-VAD | <i>P</i> Value |
|-------------|---------------|------------|----------------|
| BT#9 (10μM) | 51.2±4.8      | 54.7±2.3   | <b>0.325</b>   |
| BT#9 (20μM) | 26.5±5.5      | 27.7±4.8   | <b>0.774</b>   |

**Table S2-2. Data and *P* Value for Figure 5E**

| NAC     | BT#9 (10μM) | <i>p</i> Value | BT#9 (20μM) | <i>p</i> Value |
|---------|-------------|----------------|-------------|----------------|
| 0       | 47.5±6.2    | -              | 28.6±2.3    | -              |
| 10 μM   | 60.6±6.8    | <b>0.068</b>   | 33.7±4.0    | <b>0.131</b>   |
| 100 μM  | 70.5±6.2    | <b>0.011</b>   | 44.8±6.6    | <b>0.016</b>   |
| 1000 μM | 78.1±3.9    | <b>0.002</b>   | 62.4±6.2    | <b>0.001</b>   |

**Table S2-3. Data and *P* Value for Figure 6A**

|                | TRAIL Alone | + BT#9   | <i>p</i> Value |
|----------------|-------------|----------|----------------|
| TRAIL10ng/ml   | 7.5±1.5     | 13.8±4.7 | <b>0.045</b>   |
| TRAIL 100ng/ml | 17.5± 5.6   | 28.0±3.0 | <b>0.022</b>   |

**Table S2-4. Data and *P* Value for Figure 6C**

|                 | Docetaxel alone | + BT#9   | <i>p</i> Value |
|-----------------|-----------------|----------|----------------|
| Docetaxel 0.1μM | 11.0±2.6        | 14.2±7.3 | <b>0.516</b>   |
| Docetaxel 1μM   | 23.2± 3.9       | 24.6±3.2 | <b>0.669</b>   |

## Supplementary Figure S1: densitometry intensity ratio and uncropped picture of Figure 3B

**B**

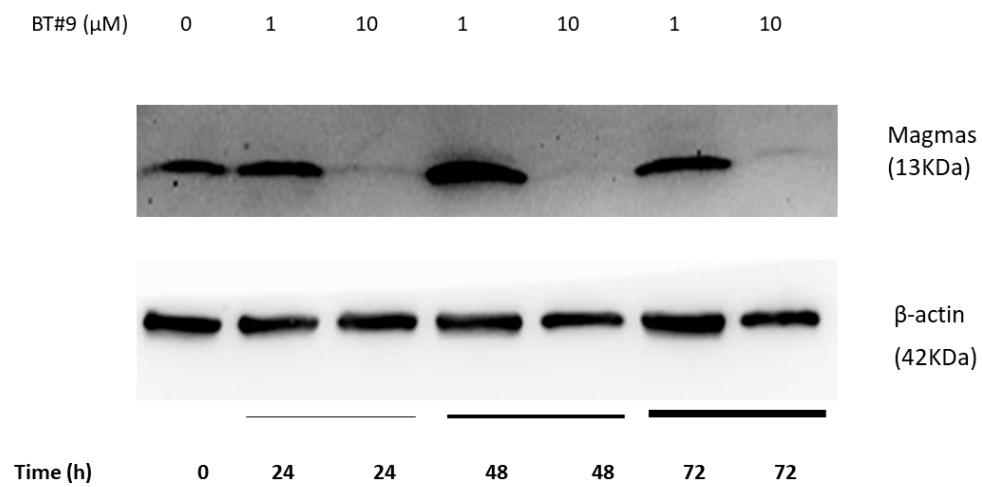

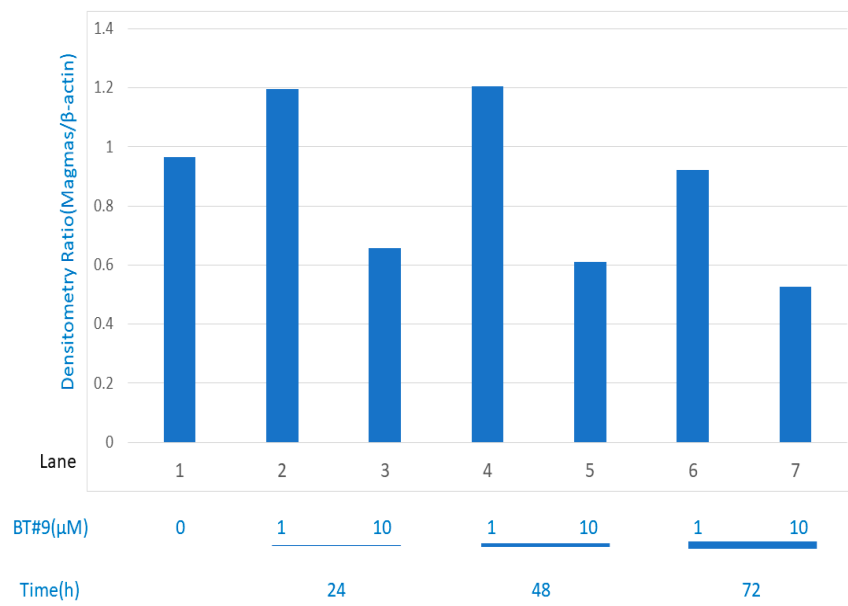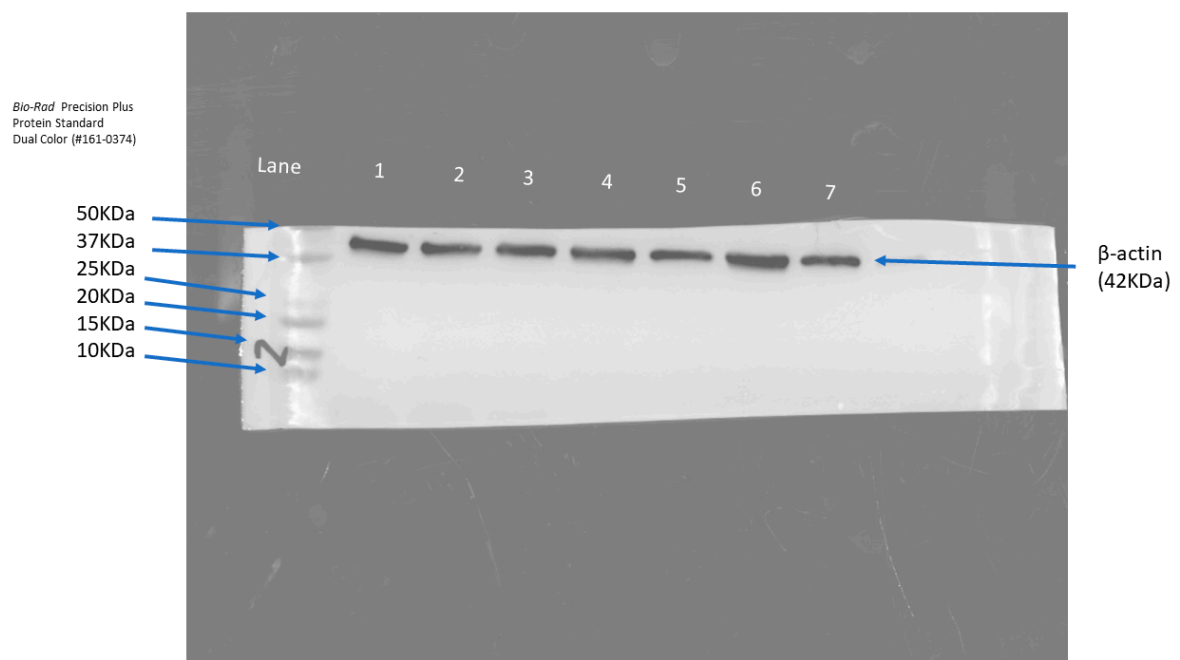

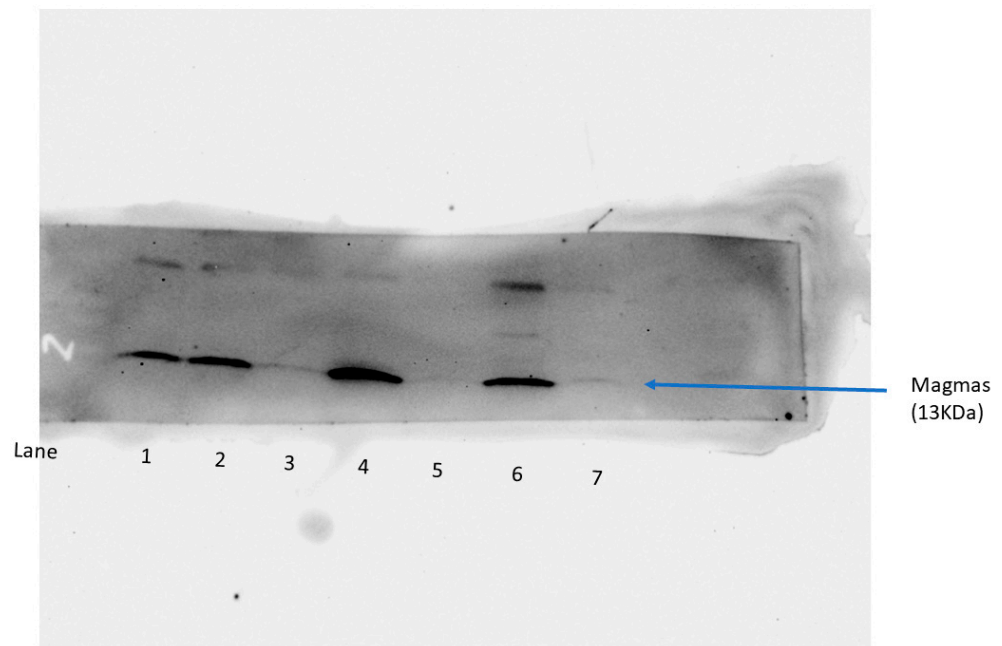

## Supplementary Figure S2(Magnified Figure 4): The mode of cell death treated by BT#9)

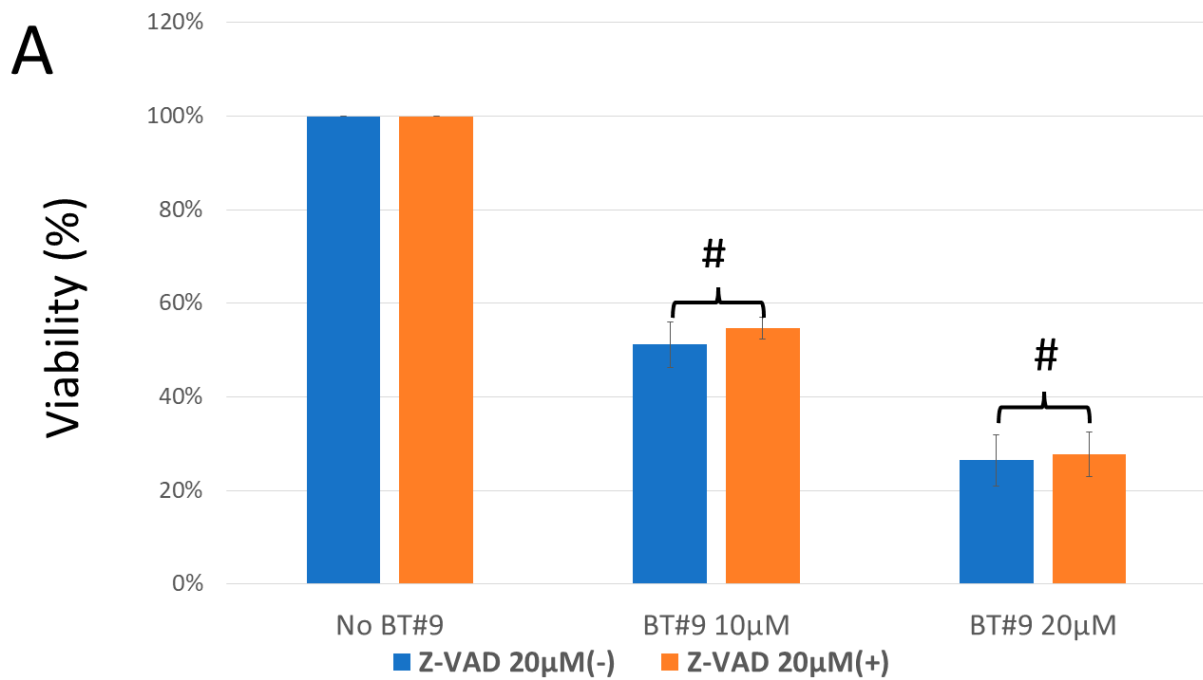

**Supplemental Figure S2A (Magnified Figure 4A):** MTS viability assay showed that General Caspase Inhibitor(Z-VAD) did not protect BT#9 induced cell death in PC-3 cells (#:  $P>0.05$ ).

**B**

JC-1 Red

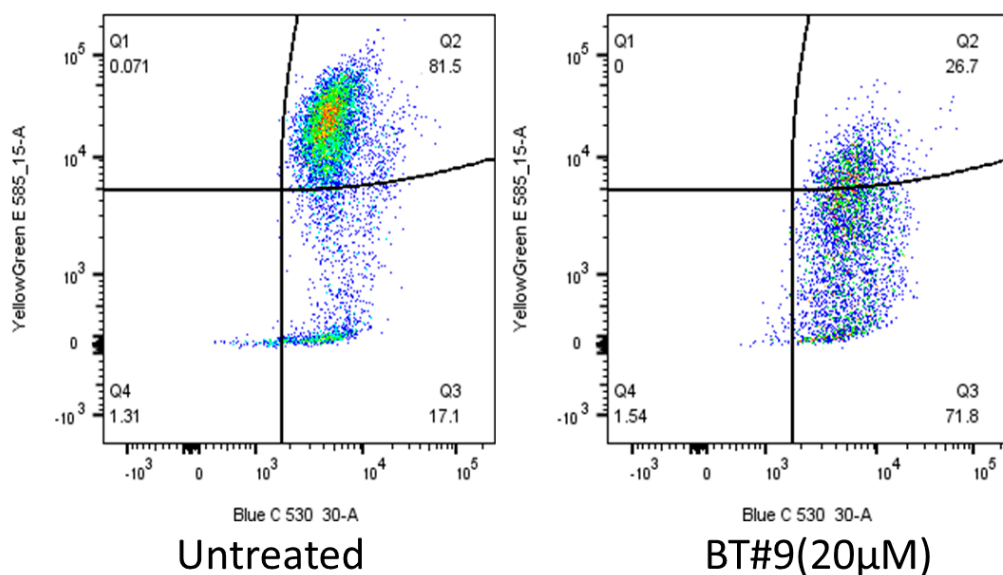

JC-1 blue

**Supplemental Figure S2B (Magnified Figure 4B):** Dot plot of fluorescence shift in PC-3 cells after treated with 20 μM BT#9 for 4 h. The ratios of red/green(Q2/Q3) were decreased from 81.5/17.3(untreated) to 26.7/71.8 (treated), indicating the loss of MMP.



C

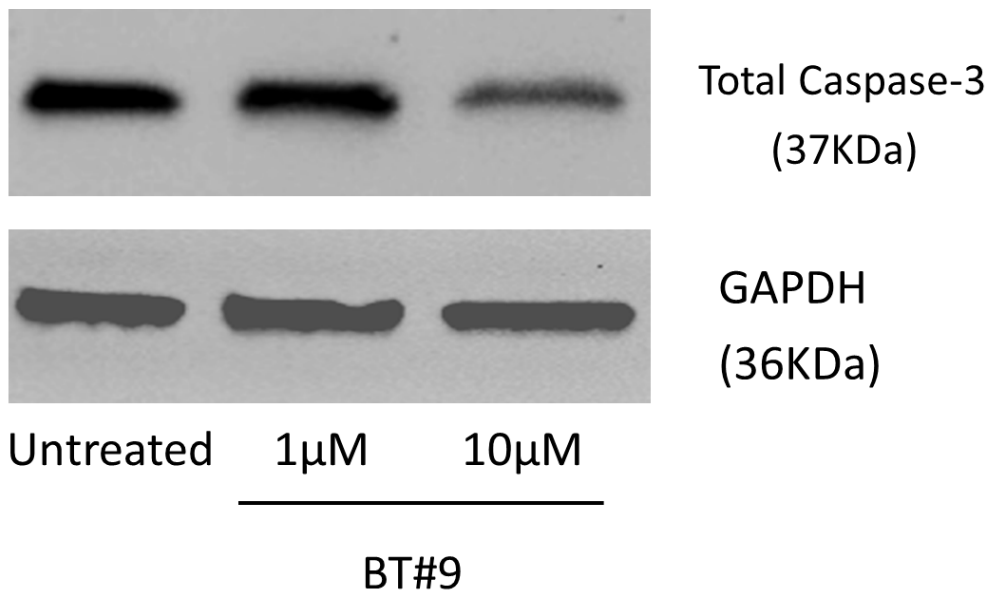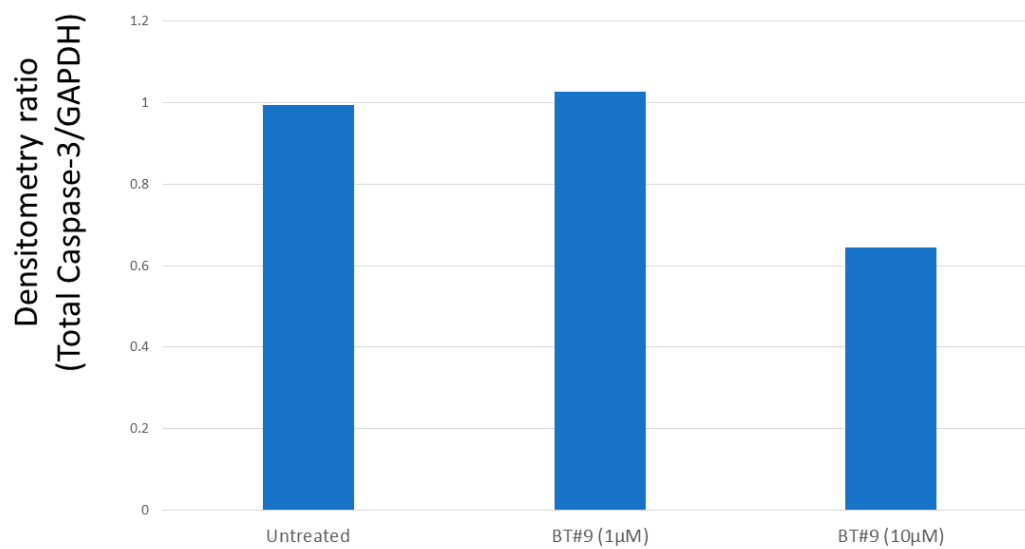

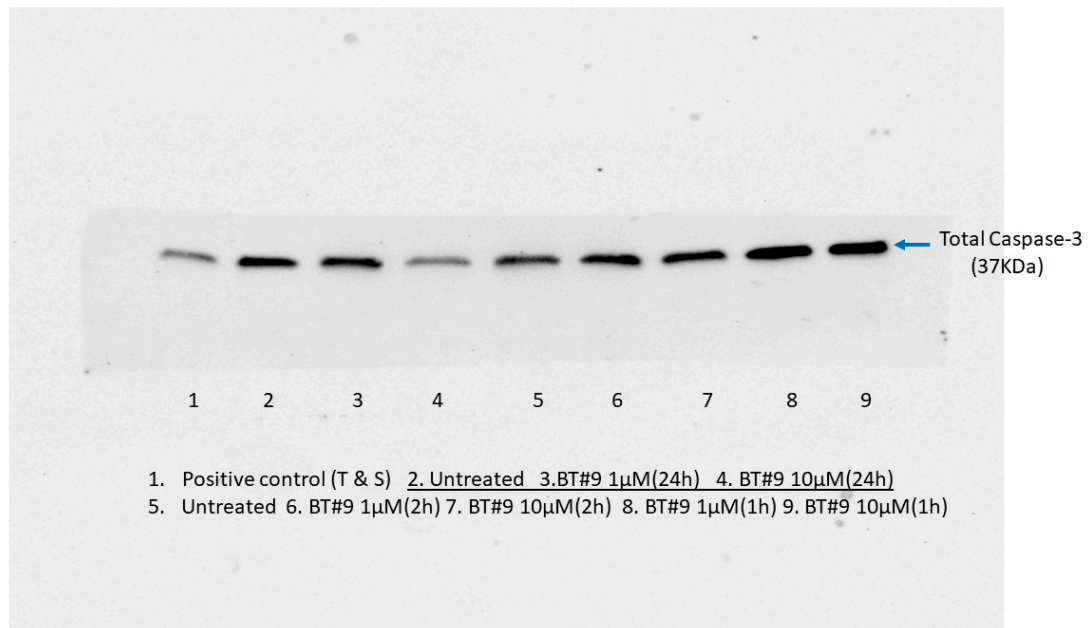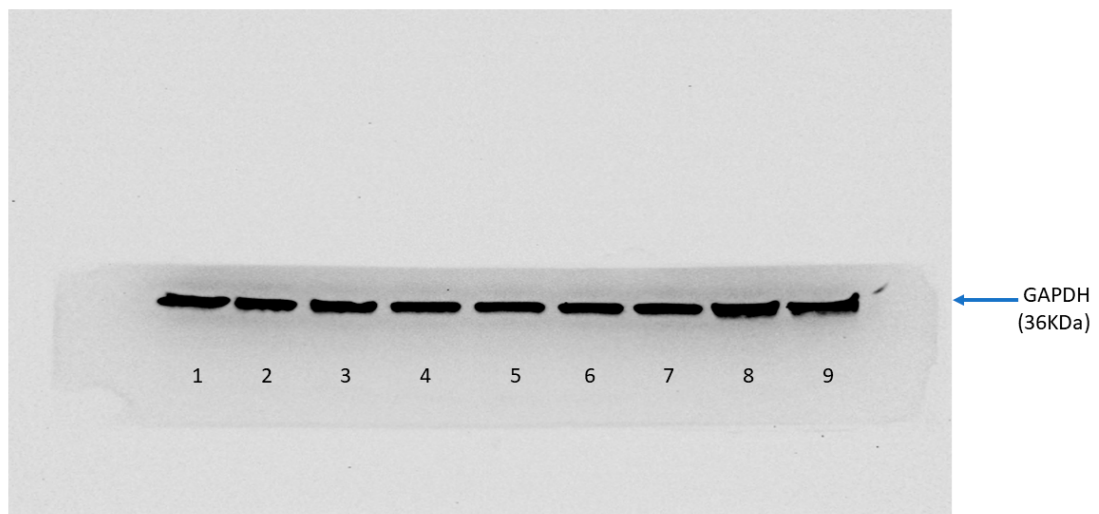

**Supplemental Figure S2C (Magnified Figure 4C):** PC-3 cells were treated by 1 μM or 10μM BT#9 for 24 hours, Western blot showed decreased total caspase-3, indicating the activation of caspase-3. Positive control (T & S, TRAIL 100ng/ml and SMAC mimic 1000nM).

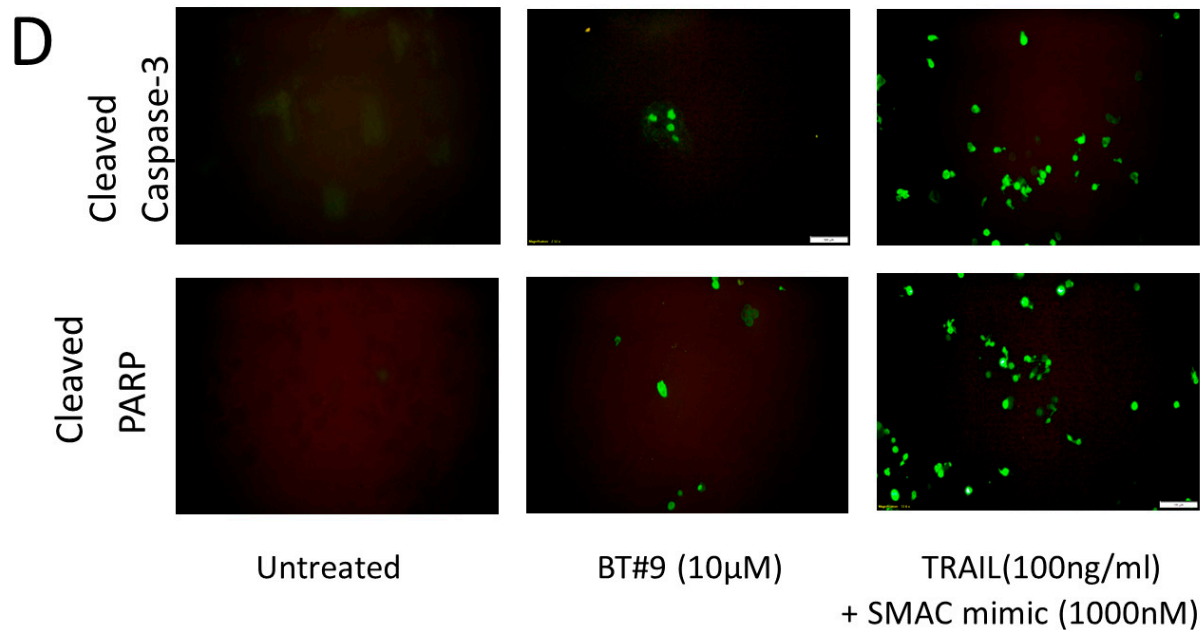

**Supplemental Figure S2D (Magnified Figure 4D):** Fluorescence microscopy also confirmed that smaller percentage of cleaved caspase-3 and cleaved PARP in PC-3 cells treated by 10 μM BT#9 when compared with positive control.

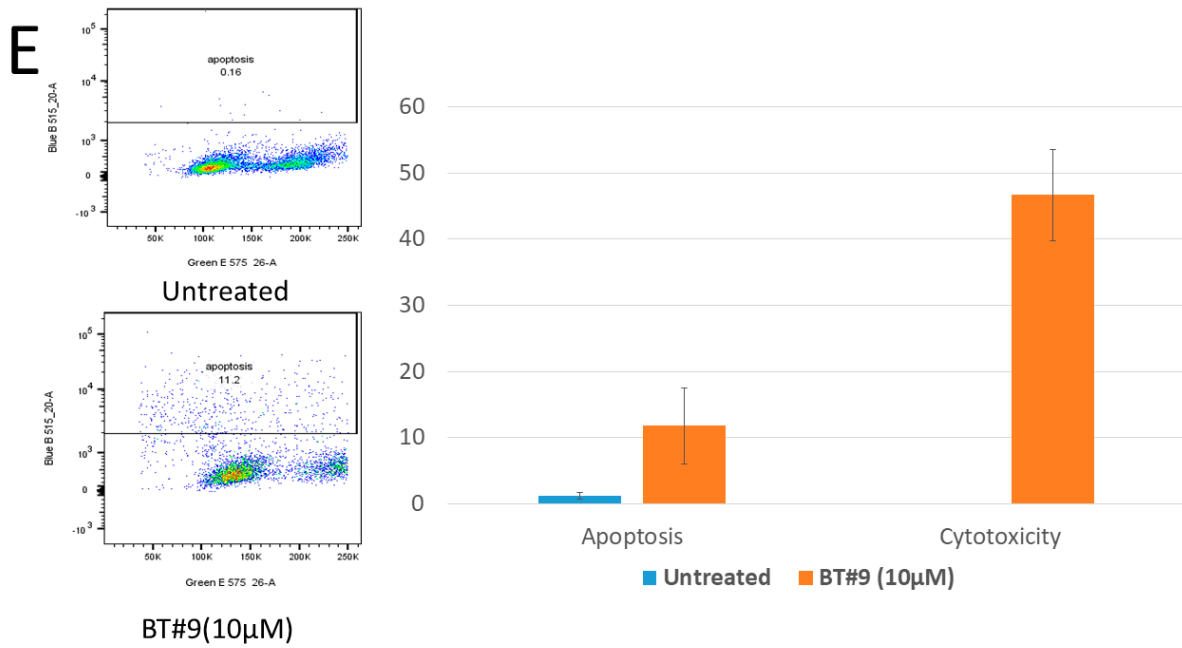

**Supplemental Figure S2E (Magnified Figure 4E):** TUNEL based Apo-BrdU apoptosis rate and MTS cell viability assay treated by BT#9.

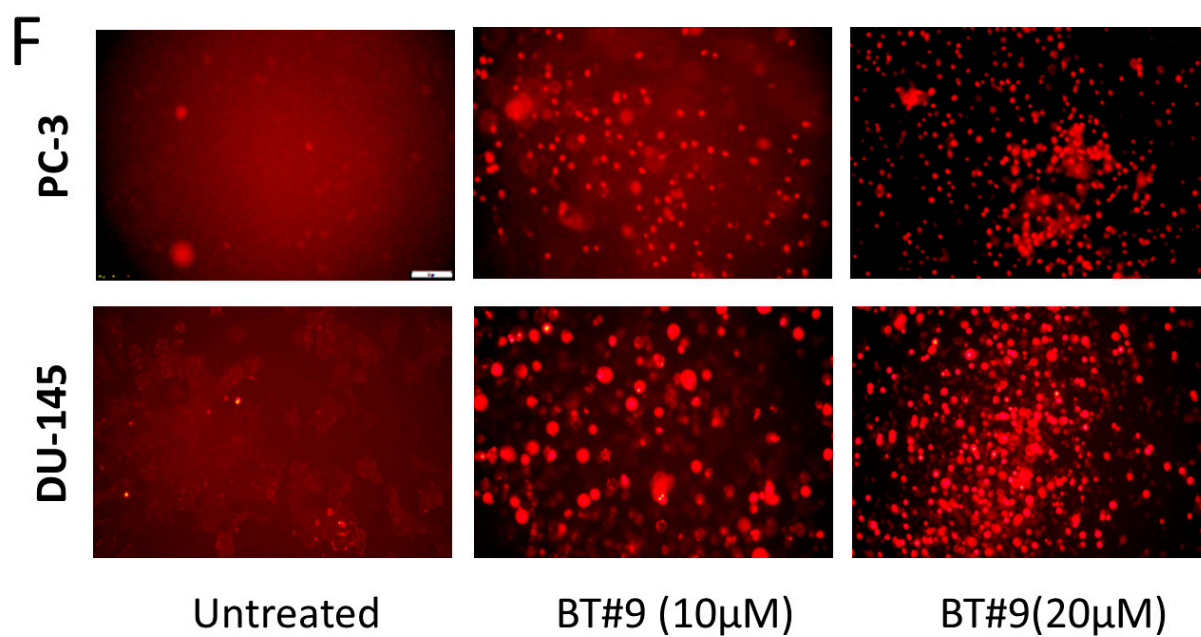

**Supplemental Figure S2F (Magnified Figure 4F):** PI staining by fluorescence microscopy; dramatic cell death treated by BT#9 at the concentration of 10 or 20  $\mu$ M were detected.

G

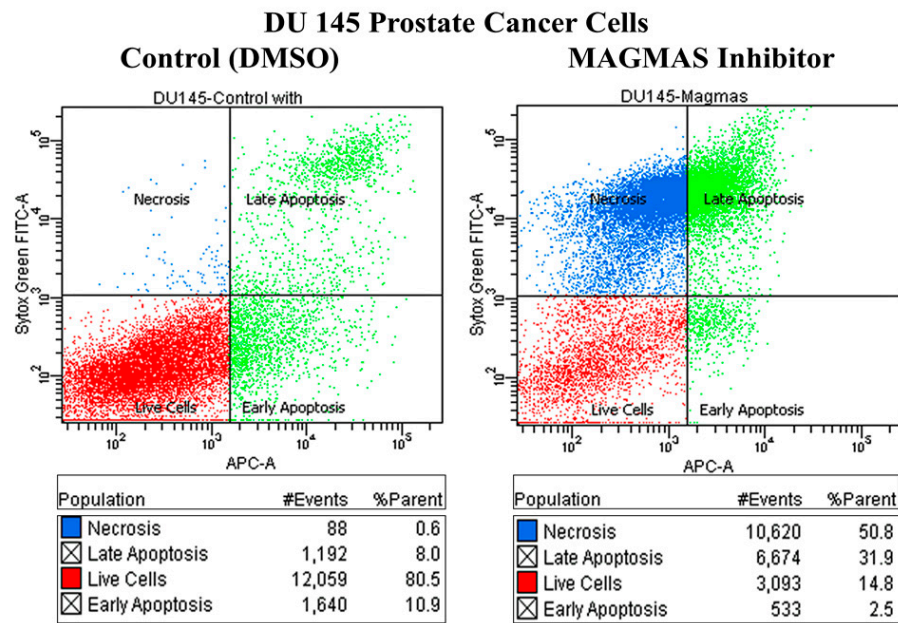

**Supplemental Figure S2G (Magnified Figure 4G):** Annexin V/SYTOX Green Assay for DU-145 cells treated by BT#9(10 $\mu$ M).

**Supplementary Figure S3(Magnified Figure 5):** The accumulation of ROS in Prostate cancer cells after BT#9 treatment.

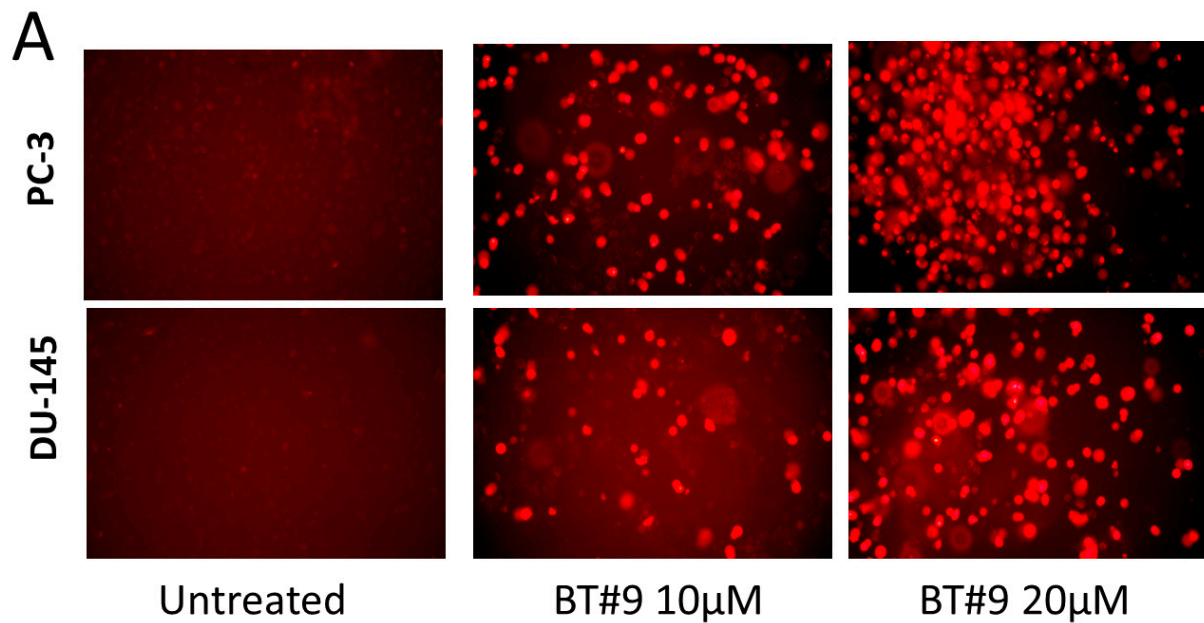

**Supplemental Figure S3A (Magnified Figure 5A):** Intra-mitochondria ROS of PC-3 and DU-145 cells detected by MitoSOX Red superoxide indicator after 10 $\mu$ M or 20 $\mu$ M BT#9 treatment.

**B****DU-145**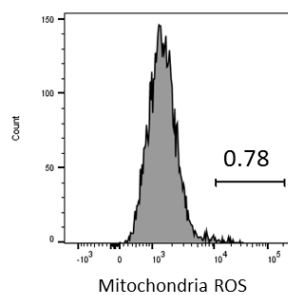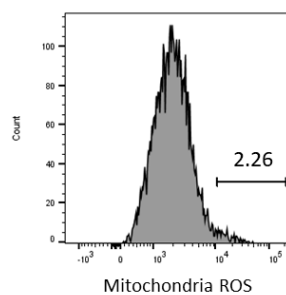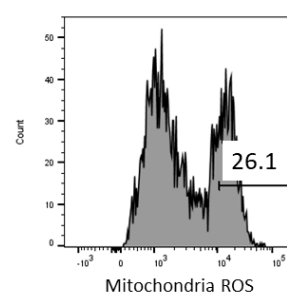**PC-3**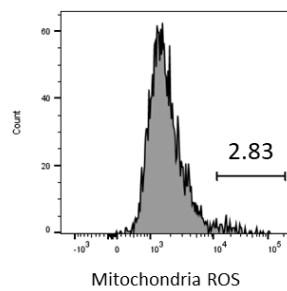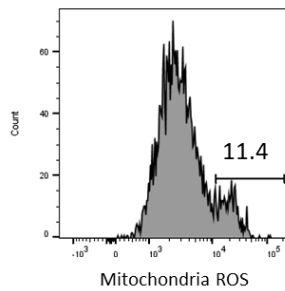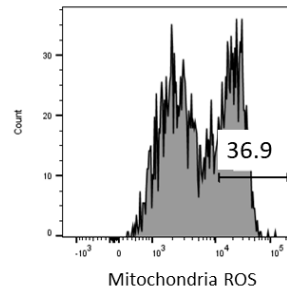**Untreated****BT#9 10µM****BT#9 20µM**

**Supplemental Figure S3B (Magnified Figure 5B):** Representative flow cytometry histograms of MitoSOX Red fluorescence (530 nm laser, PE channel) in PC-3 and DU-145 cells treated by 10µM and 20µM BT#9. Percentage of MitoSOX Red positive cells was analyzed and quantified by FlowJo Software.



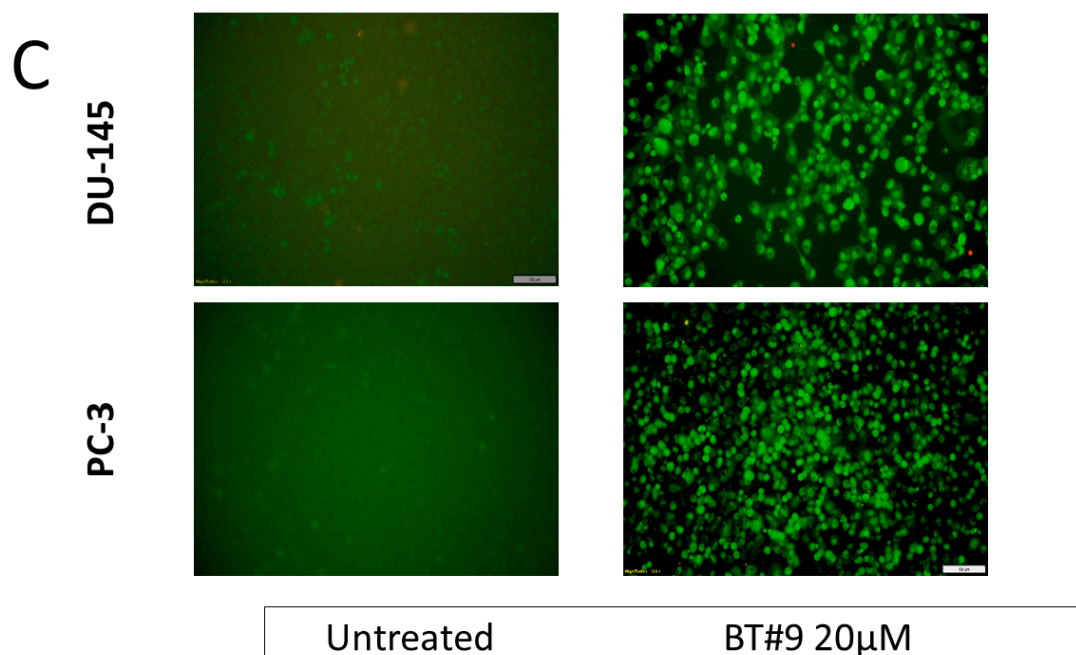

**Supplemental Figure S3C (Magnified Figure 5C):** PC-3 and DU-145 cells were treated by BT#9 for 24 h, stained by 5  $\mu$ M CellROX Green Reagent, and Intracellular ROS was detected by fluorescence microscopy.

D

DU-145

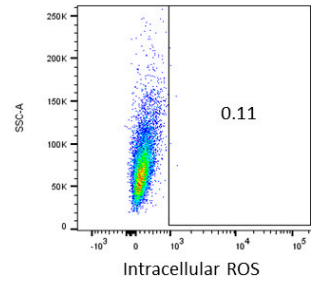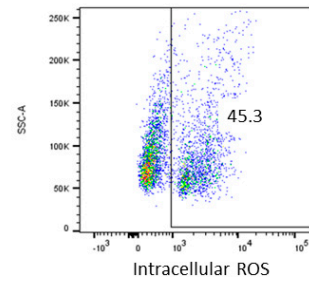

PC-3

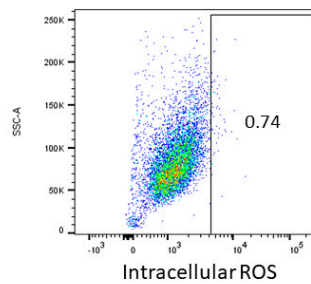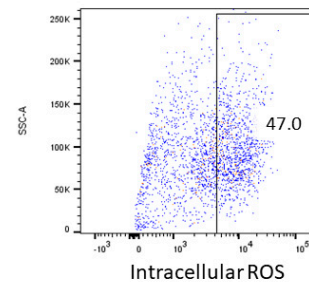

Untreated

BT#9(20μM)

**Supplemental Figure S3D (Magnified Figure 5D):** FCM measured the intracellular ROS level in both PC-3 and DU-145 cells, showing significant ROS acculation after BT#9 treatment (20 μM).

**E**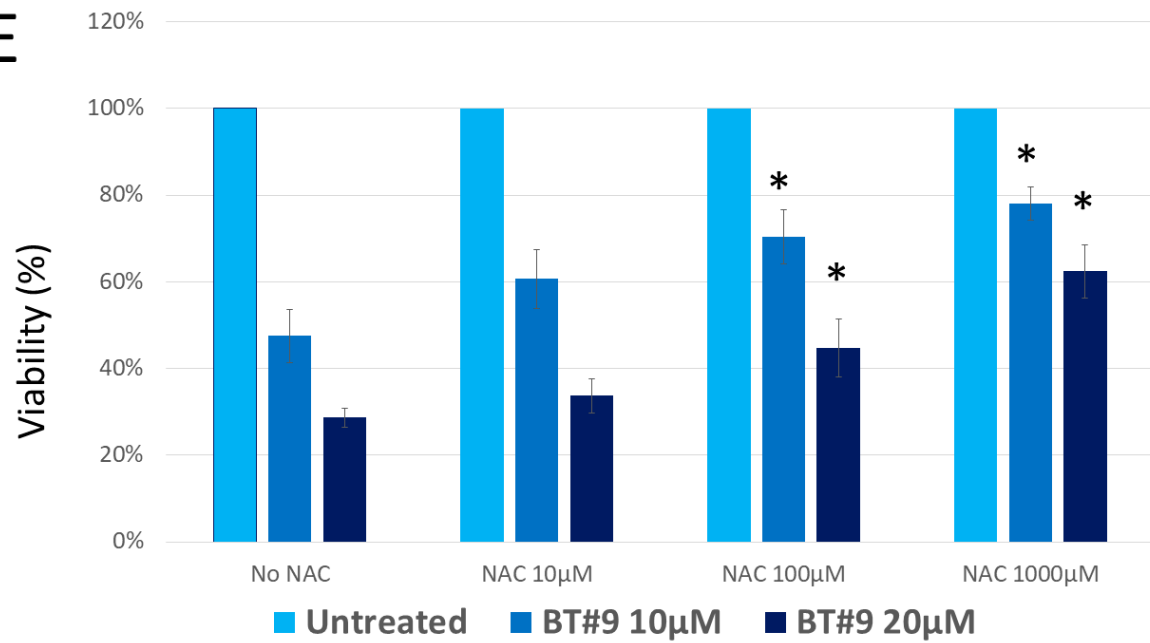

**Supplemental Figure S3E (Magnified Figure 5E):** NAC protected BT#9 induced cell death in a dose dependent way.

## Supplementary Figure S4 (Magnified Figure 6): The combination of BT#9 and TRAIL or Docetaxel

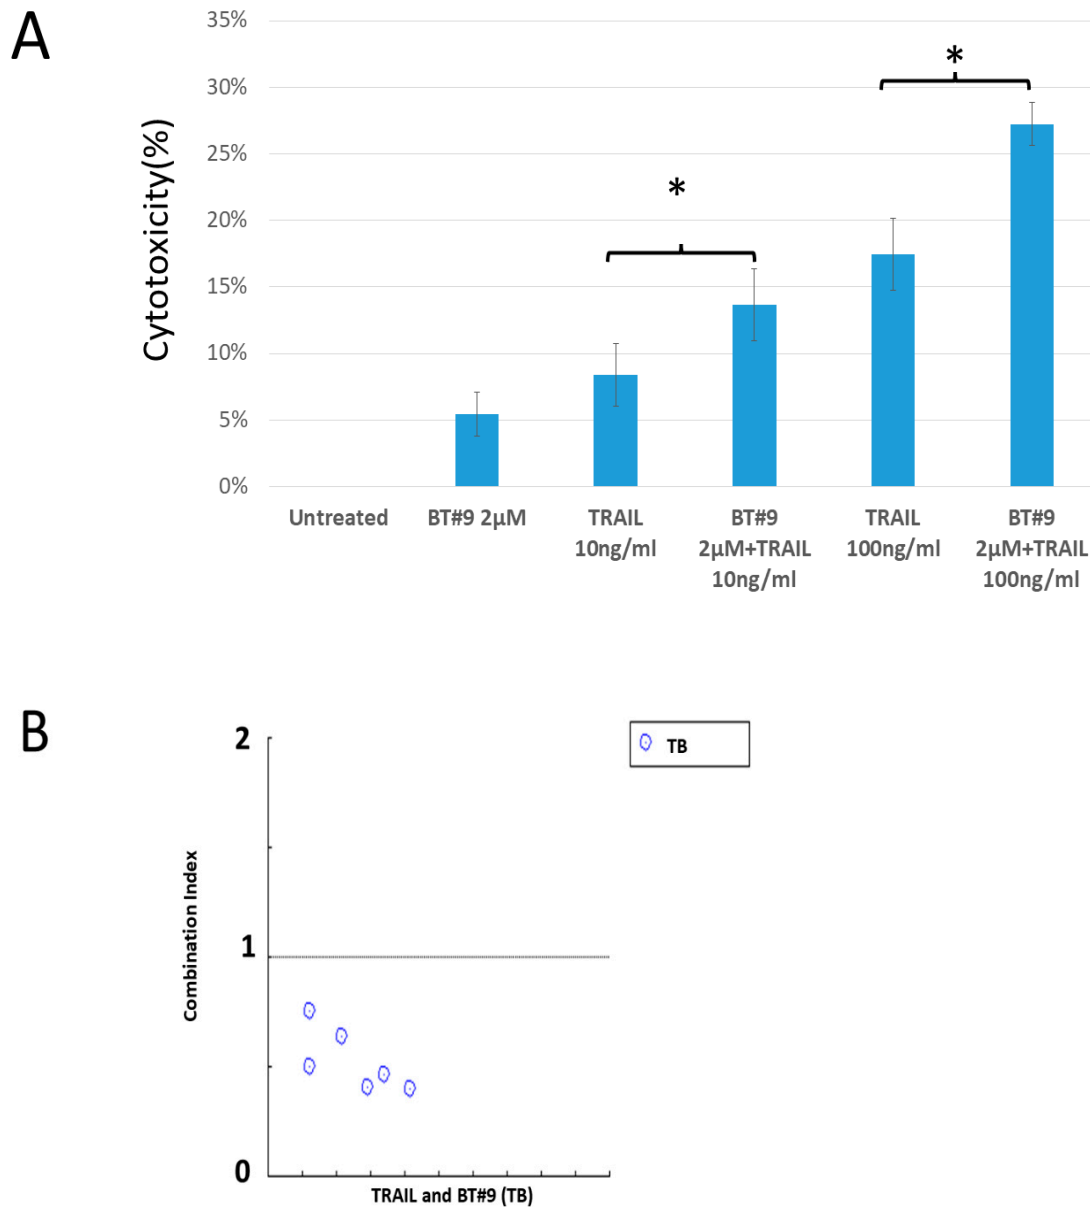

**Supplemental Figure S4A and S4B (Magnified Figure 6A and 6B):** The representative result of the combination of BT#9 (2μM) and TRAIL (10ng/ml or 100ng/ml). The whole CI of BT#9 (1,2 or 5μM) and TRAIL (10 or 100ng/ml) is between 0.22 and 0.72.

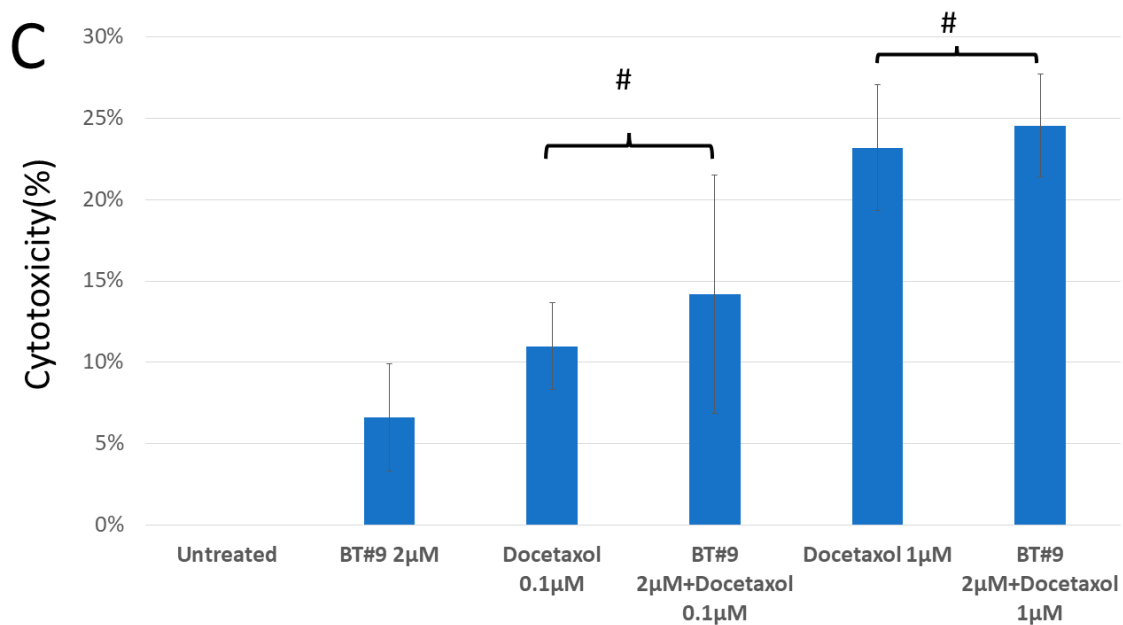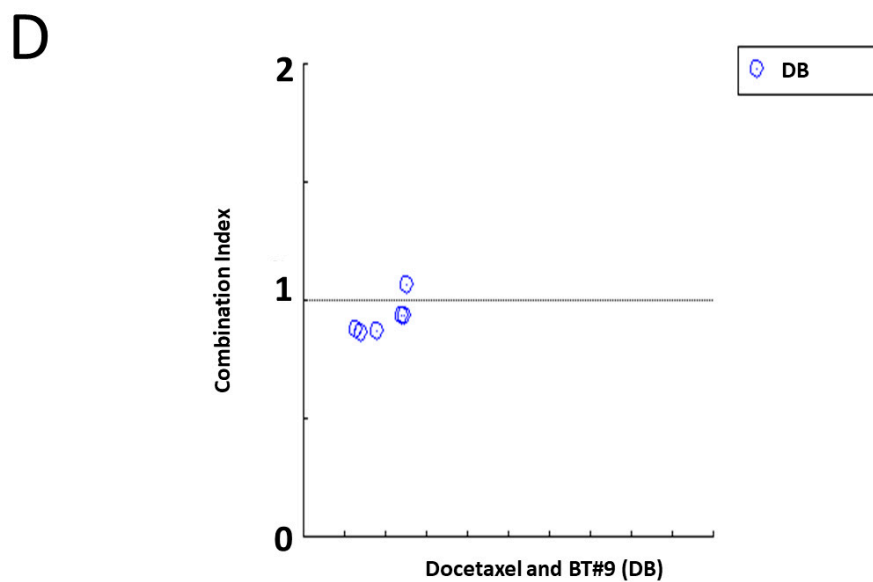

**Supplemental Figure S4C and S4D (Magnified Figure 6C and 6D):** The representative result of the combination between BT#9 (2μM) and Docetaxel (0.1μM or 1μM). The whole CI of the concurrent combination of BT#9 (1, 2 or 5μM) and Docetaxel (0.1 or 1μM) is between 0.86 and 1.06.

E

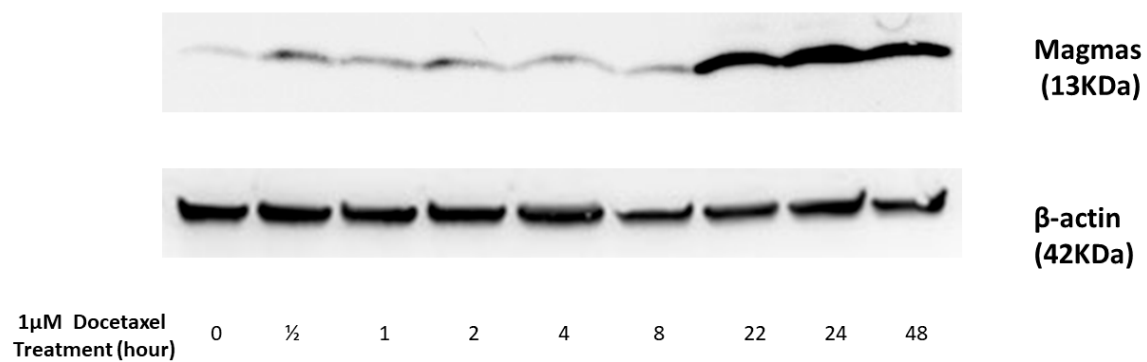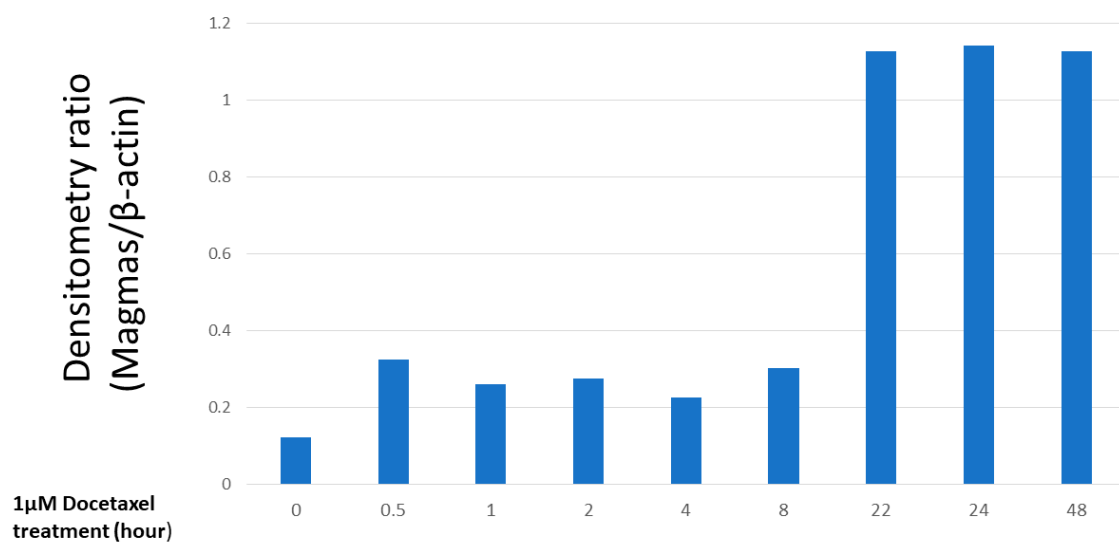

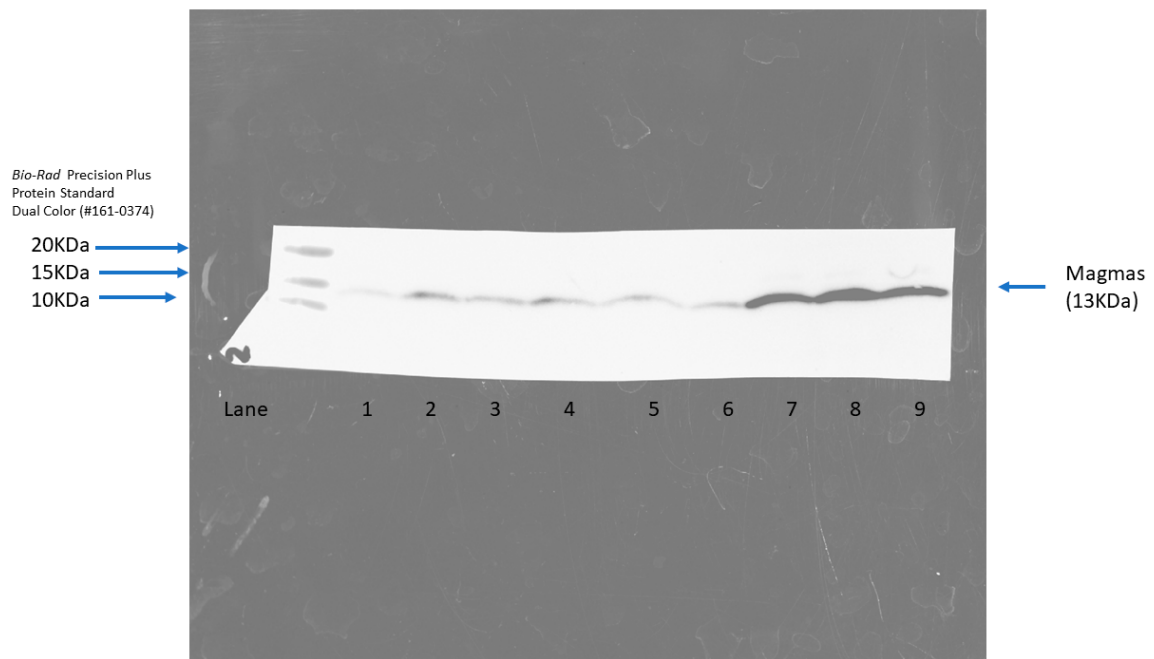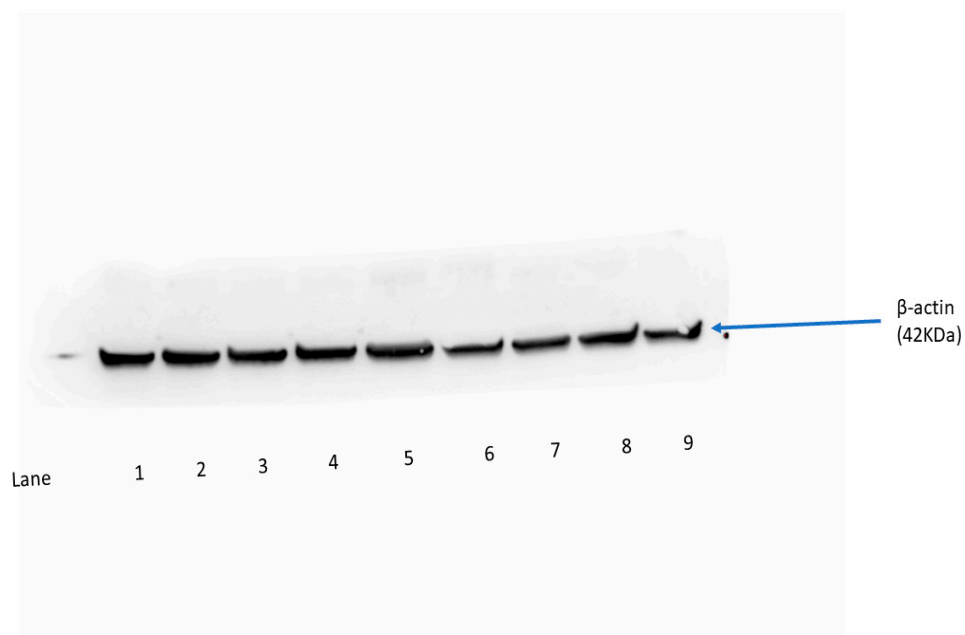

**Supplemental Figure S4E (Magnified Figure 6E):** The Magmas expression of PC-3 cells was upregulated around 24 hours or later after 1 $\mu$ M Docetaxel treatment.

F

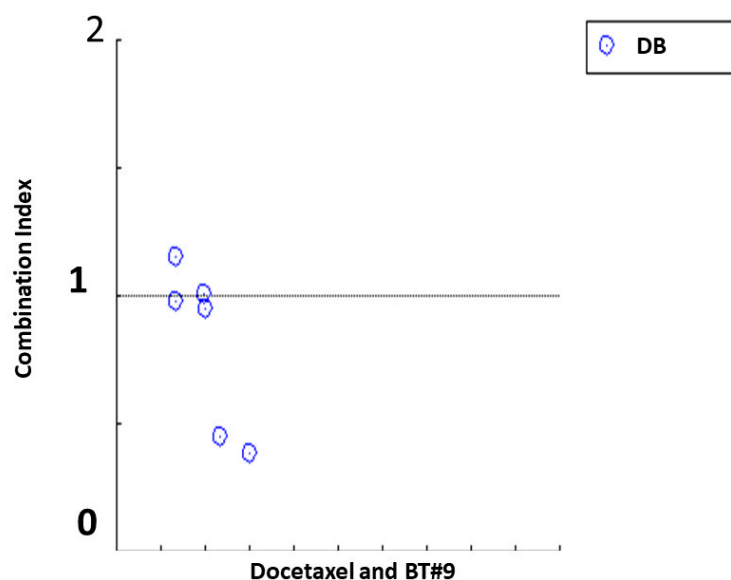

**Supplemental Figure S4F (Magnified Figure 6F):** The whole CI of the sequential combination of BT#9 (1,2 or 5 $\mu$ M) and Docetaxel (0.1 or 1 $\mu$ M) is between 0.39 and 1.15. Among all 6 dots, upper 4 dots (CI=0.95-1.15) represent CI for Docetaxel (0.1 or 1 $\mu$ M) and BT#9 (1 or 2 M $\mu$ ), lower 2 dots (CI=0.39-0.45) represent CI for Docetaxel (0.1 or 1 $\mu$ M) and BT#9(5 $\mu$ M).
